# Supplementary material
Source: publisher figshare collection journal article supplement (https://springernature.figshare.com/ndownloader/files/14766101)
Supplement: Supplementary file [file 14766101]

## **Additional File 1**

### **Expression and secretion of a lytic polysaccharide monooxygenase by a fast-growing cyanobacterium**

D.A. Russo<sup>1</sup>, J.A.Z. Zedler<sup>1</sup>, D.N. Wittmann<sup>1</sup>, B. Möllers<sup>2</sup>, R.K. Singh<sup>3</sup>, T.S. Batth<sup>4</sup>, B. van Oort<sup>5</sup>, J.V. Olsen<sup>4</sup>, M. J. Bjerrum<sup>3</sup> and P.E. Jensen<sup>1</sup>

<sup>1</sup>Copenhagen Plant Science Centre, Department of Plant and Environmental Sciences, University of Copenhagen, Frederiksberg C, Denmark

<sup>2</sup>Department of Geosciences and Natural Resource Management, University of Copenhagen, Frederiksberg C, Denmark

<sup>3</sup>Department of Chemistry, University of Copenhagen, Copenhagen, Denmark

<sup>4</sup>Novo Nordisk Foundation Center for Protein Research, Faculty of Health and Medical Sciences, University of Copenhagen, Copenhagen, Denmark

<sup>5</sup>Biophysics of Photosynthesis, Department of Physics and Astronomy, Faculty of Sciences, Vrije Universiteit Amsterdam, Amsterdam, Netherlands

Additional File 1: Expression and secretion of a lytic polysaccharide monooxygenase by a fast-growing cyanobacterium

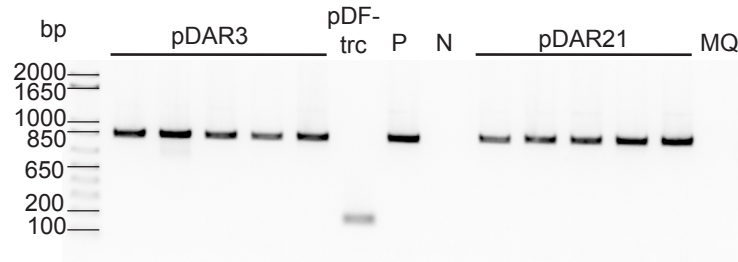

**Figure S1.** PCR analysis of *S. elongatus* UTEX 2973 strains *TfAA10A* (pDAR3) and *TorA-TfAA10A* (pDAR21). Lanes show the colonies from transformation of *S. elongatus* UTEX 2973 with plasmids pDAR3 (*TfAA10A*), pDAR 21 (*TorA-TfAA10A*) and an empty vector control (pDF-trc). P denotes a positive control reaction (using pDAR3 plasmid DNA), N denotes a negative control (wild-type *S. elongatus* UTEX 2973) and MQ denotes a H<sub>2</sub>O PCR control. The following primers (5' – 3') were used for amplification of the gene of interest: trc-F (attctgaaatgagctgttga) and trc-R (atcaggctgaaaatcttctc).

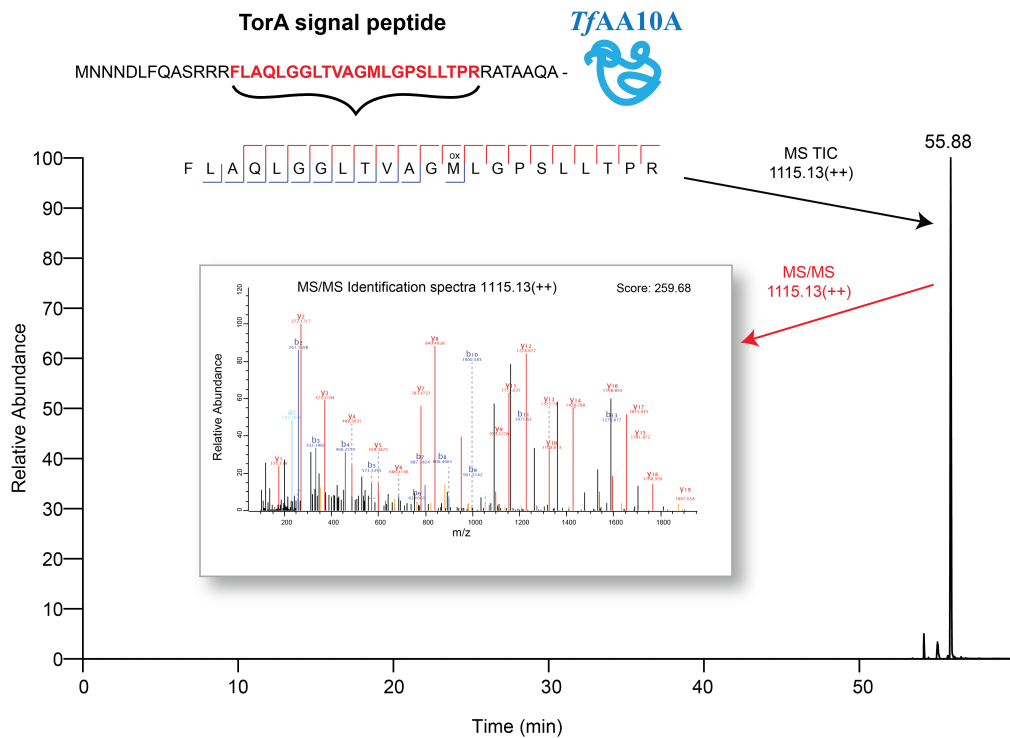

**Figure S2.** Identification of the *TorA* signal peptide in the pre-protein *TorA-TfAA10A*, found in the plasma membrane fraction, by mass spectrometry.

# Additional File 1: Expression and secretion of a lytic polysaccharide monooxygenase by a fast-growing cyanobacterium

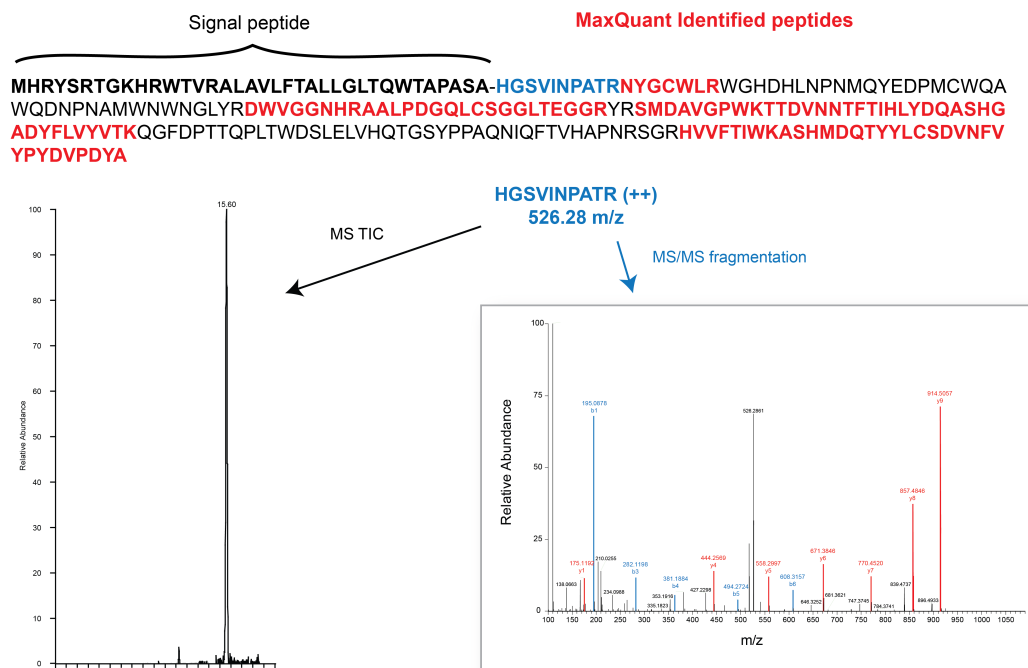

**Figure S3.** Identification of the secreted *TfAA10A* by mass spectrometry. The inset highlights the identification of the mature N-terminal tryptic peptide confirming correct processing of the secreted *TfAA10A*.

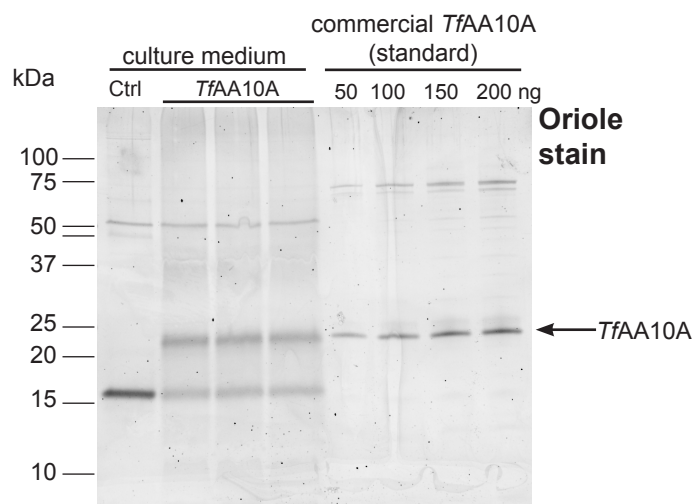

**Figure S4.** Densitometric analysis of secreted *TfAA10A*. The first four lanes show culture medium loaded to an equivalent of 200  $\mu$ L of cell-free medium. The subsequent four lanes show a standard curve of 50 – 200 ng of a commercial *TfAA10A*. The *TfAA10A* protein is indicated with an arrow. Ctrl denotes an empty vector control (pDF-trc).

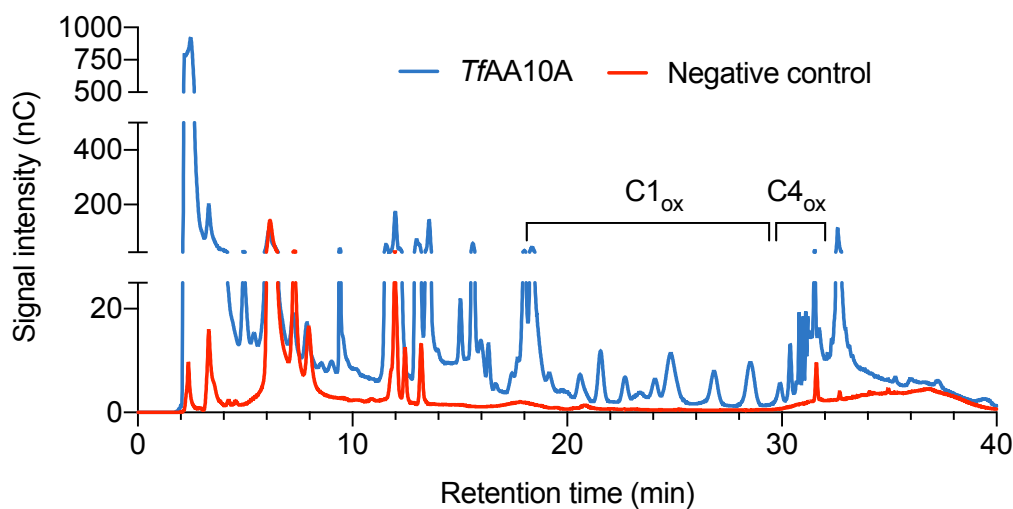

**Figure S5.** PASC oxidation by *TfAA10A*. *TfAA10A* catalyzed oxidation of PASC was performed in 50 mM phosphate buffer (pH 7.5). All reaction mixtures contained 2 mM ascorbate, 0.75% w/v PASC and 2  $\mu$ g purified and reconstituted *TfAA10A*. The negative control omitted the enzyme. Reactions were carried out at 50 °C for 24 hours. C1<sub>ox</sub> – C1 oxidation products. C4<sub>ox</sub> – C4 oxidation products. Results are representative of n = 3.
